# Supplementary material for: Microwave-assisted ultrafast fabrication of high-performance polypyrrole nanoparticles for photothermal therapy of tumors in vivo
Source: Royal Society of Chemistry journal article supplement (doi:10.1039/c8bm00653a), 2018-01-01
Supplement: c8bm00653a1.pdf [file c8bm00653a1.pdf]

## Supporting Information

### **Microwave-Assisted Ultrafast Fabrication of High-Performance Polypyrrole Nanoparticles for Photothermal Therapy of Tumors in Vivo**

Cai Zhang,<sup>a</sup> Haiyan Pan,<sup>b</sup> Xu Wang<sup>\*c</sup> and Shao-Kai Sun<sup>\*b</sup>

<sup>a</sup> College of Chemistry, Research Center for Analytical Sciences, State Key Laboratory of Medicinal Chemical Biology, and Tianjin Key Laboratory of Molecular Recognition and Biosensing, Nankai University, Tianjin 300071, China

<sup>b</sup> School of Medical Imaging, Tianjin Medical University, Tianjin 300203, China.

Email: shaokaisun@163.com

<sup>c</sup> Tianjin Key Laboratory on Technologies Enabling Development of Clinical Therapeutics and Diagnostics (Theranostics), School of Pharmacy, Tianjin Medical University, Tianjin 300070, PR China. Email: wangxu2014@tmu.edu.cn

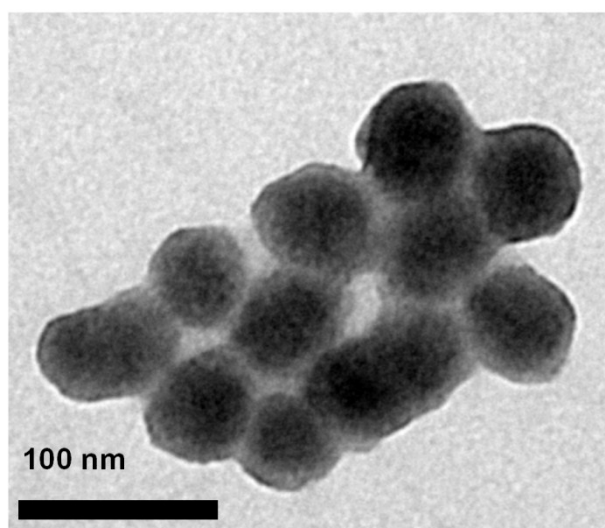

**Figure S1.** TEM of PPy nanoparticles synthesized using a traditional method.

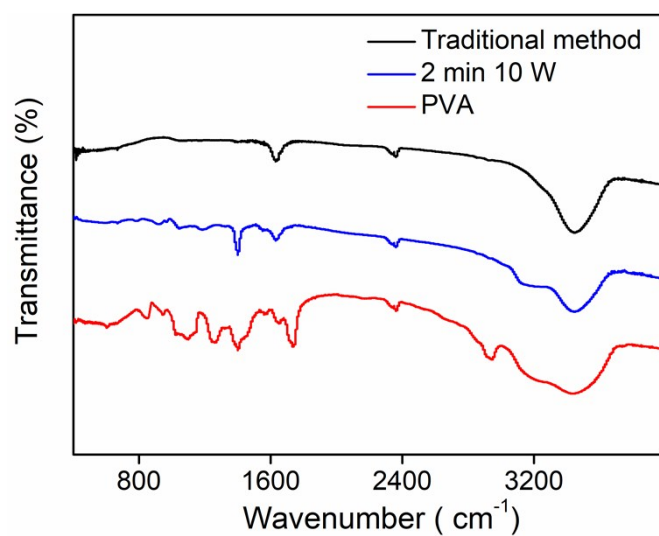

**Figure S2.** FTIR spectra of PVA and two kinds of PPy nanoparticles synthesized by microwave-assisted and traditional method, respectively.

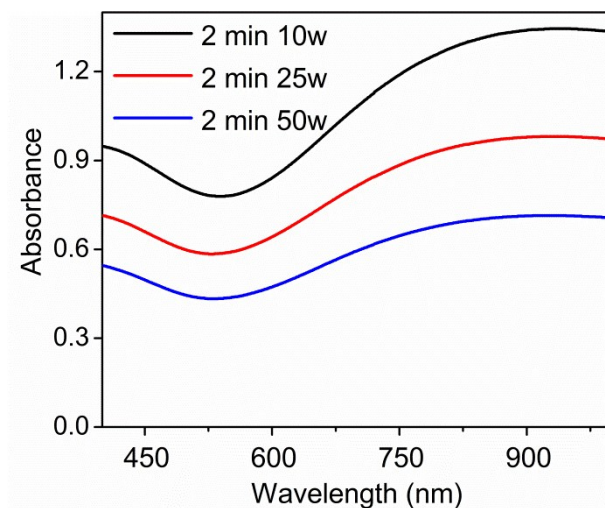

**Figure S3.** Absorption spectra of PPy nanoparticles ( $100 \mu\text{g/mL}$ ) synthesized with different microwave power densities and fixed synthetic time of 2 mins.

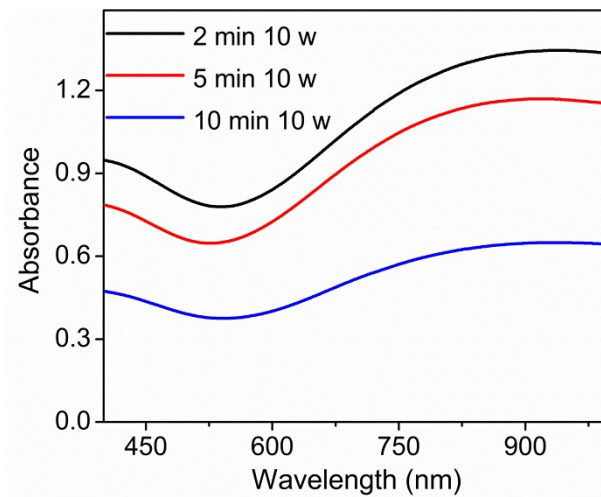

**Figure S4.** Absorption spectra of PPy nanoparticles (100 µg/mL) produced with different synthetic time and fixed power (10 W).

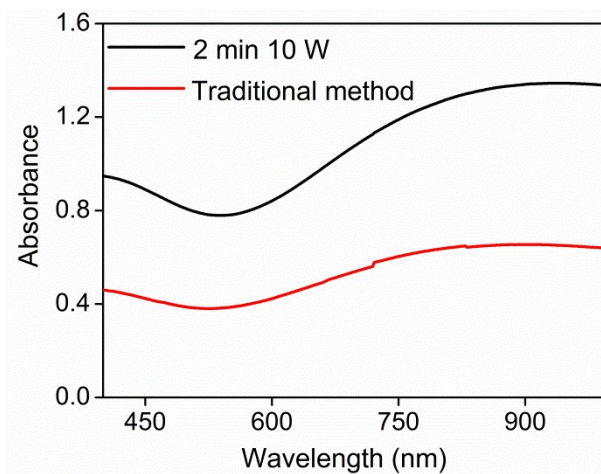

**Figure S5.** Absorption spectra of the two types of PPy nanoparticles produced by different methods.

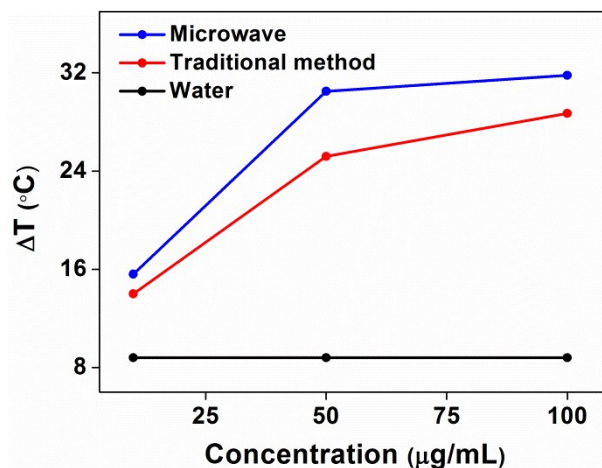

**Figure S6.** Temperature changes of water and two types of PPy nanoparticles (synthesized by microwave-assisted and traditional methods) with different concentrations (10, 50, 100 μg/mL) after irradiated by 808 nm laser for 10 mins.

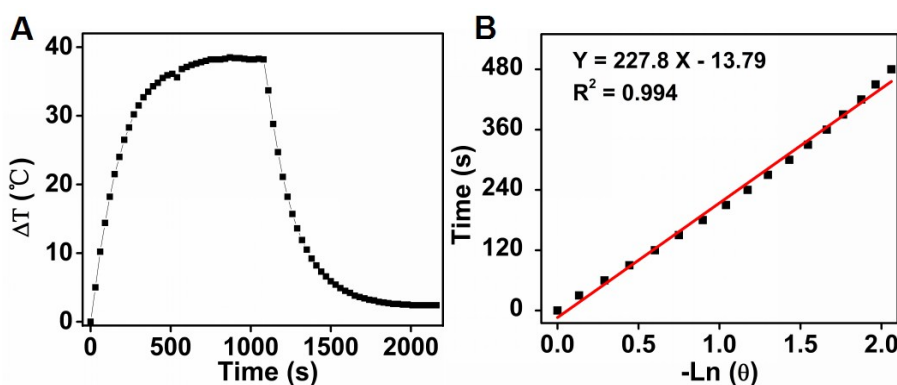

**Figure S7.** (A) The photothermal conversion efficiency ( $\eta$ ) of PPy prepared by microwave method was measured by a cycle of LASER ON/OFF treatment. (B) Plot of cooling time versus negative natural logarithm of the driving force temperature was obtained from the cooling stage. Time constant for heat transfer ( $\tau_s$ ) of this system is determined to be 227.8 s.

Detailed calculation of the photothermal conversion efficiency ( $\eta$ ) was given as follows:

$\eta = (hs(T_{\max}-T_{\text{surr}})-Q_0)/(I(1-10^{-A}))$ , where  $h$  means the heat transfer coefficient and  $s$  is the surface area of the container. The value of  $hs$  is gained from Figure S7B, and  $T_{\max}-T_{\text{surr}}$  is the temperature change of the PPy solution between the maximum steady temperature and ambient temperature (Figure S7A).  $Q_0$  refers to heat dissipated from light absorbed by the solvent and the container.  $I$  is the power density of the laser, and  $A$  represents the absorbance of PPy at 808 nm. According to the equation, the photothermal conversion efficiency of PPy nanoparticles at 808 nm is calculated to be 21.47%.

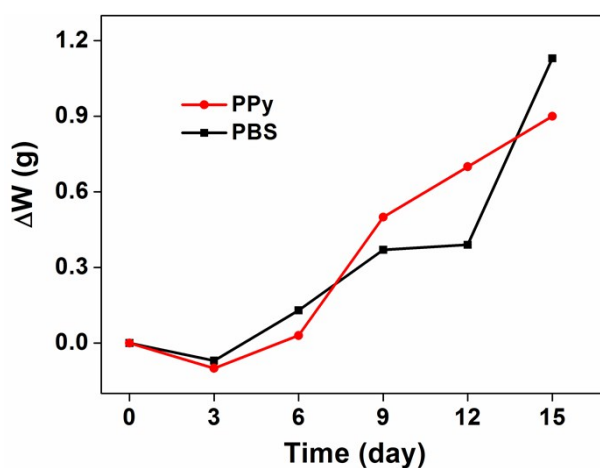

**Figure S8.** Body weight changes of mice after the administration of PPy nanoparticles (20  $\mu$ L, 4 mg/mL) or PBS in 15 days.

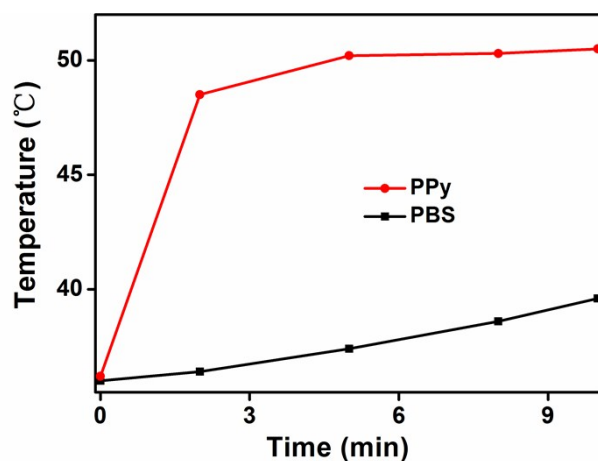

**Figure S9.** The surface temperature change of the tumors treated with PPy nanoparticles or PBS and laser irradiation at a power density of 0.33 W/cm<sup>2</sup> for 10 mins.

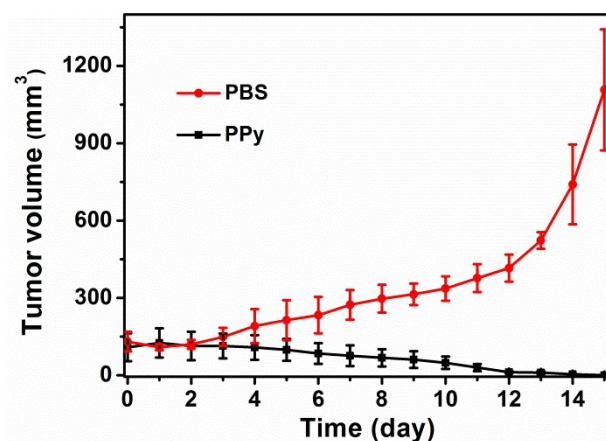

**Figure S10.** Tumor volume monitoring of mice after treated with PBS or PPy nanoparticles and laser irradiation (0.33 W/cm<sup>2</sup>, 10 mins) in 15 days (20  $\mu$ L, 4 mg/mL).
